# Supplementary material for: Maternally-derived antibodies do not prevent transmission of swine influenza A virus between pigs
Source: Springer Nature journal article supplement (doi:10.1186/s13567-016-0365-6), 2016-08-17

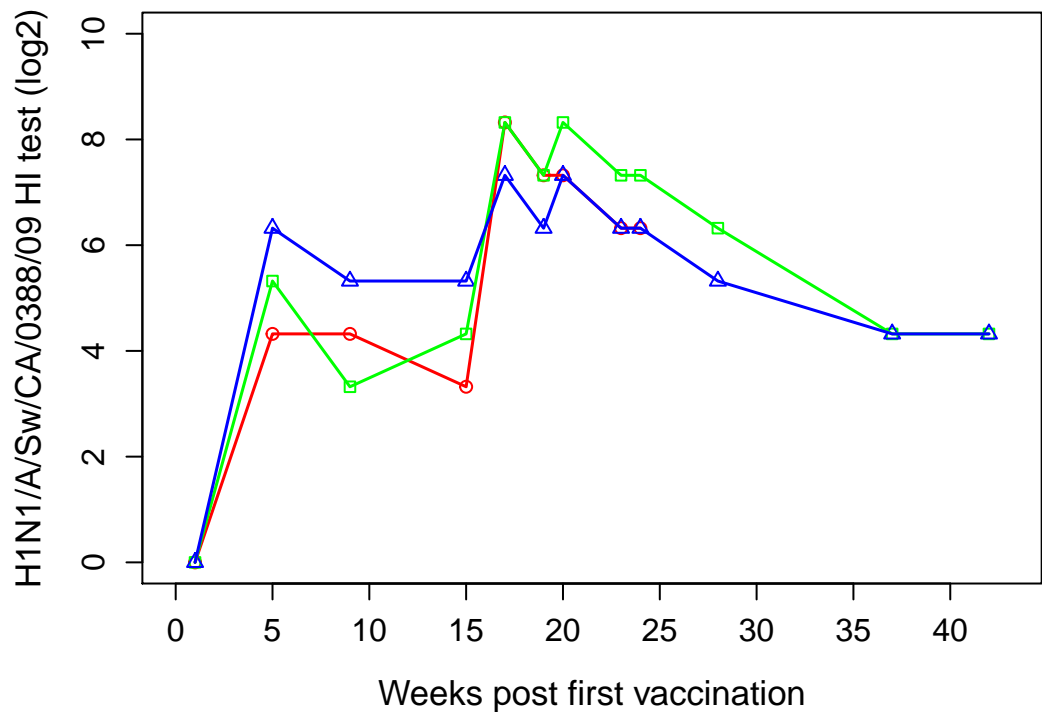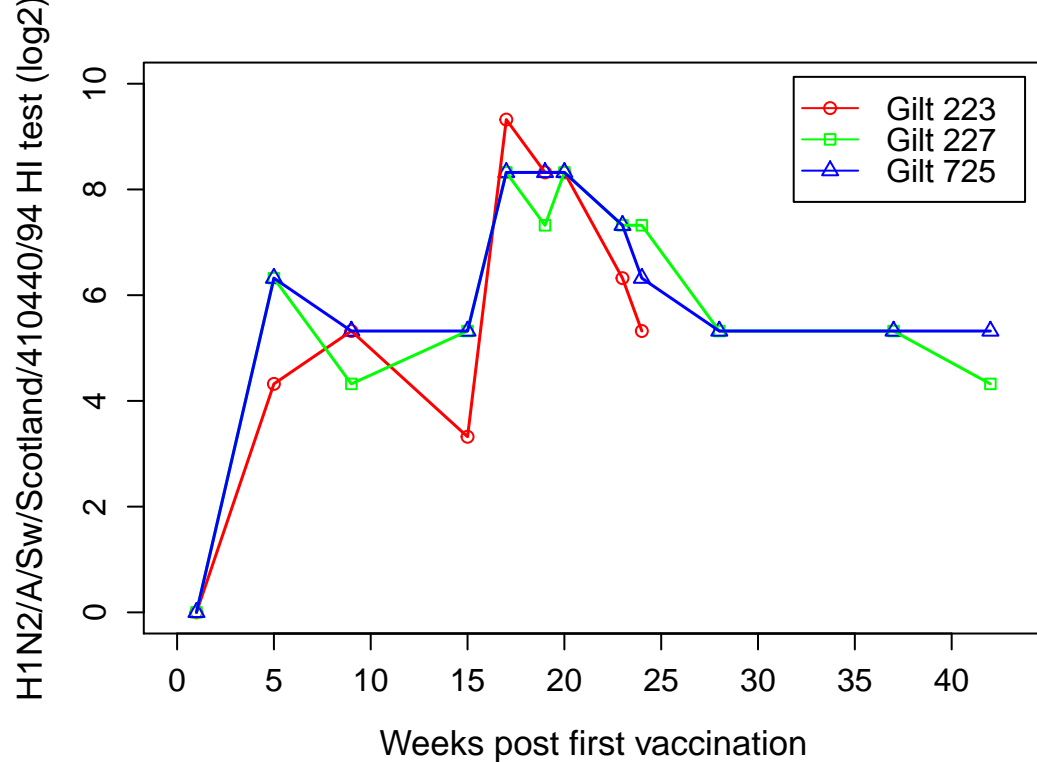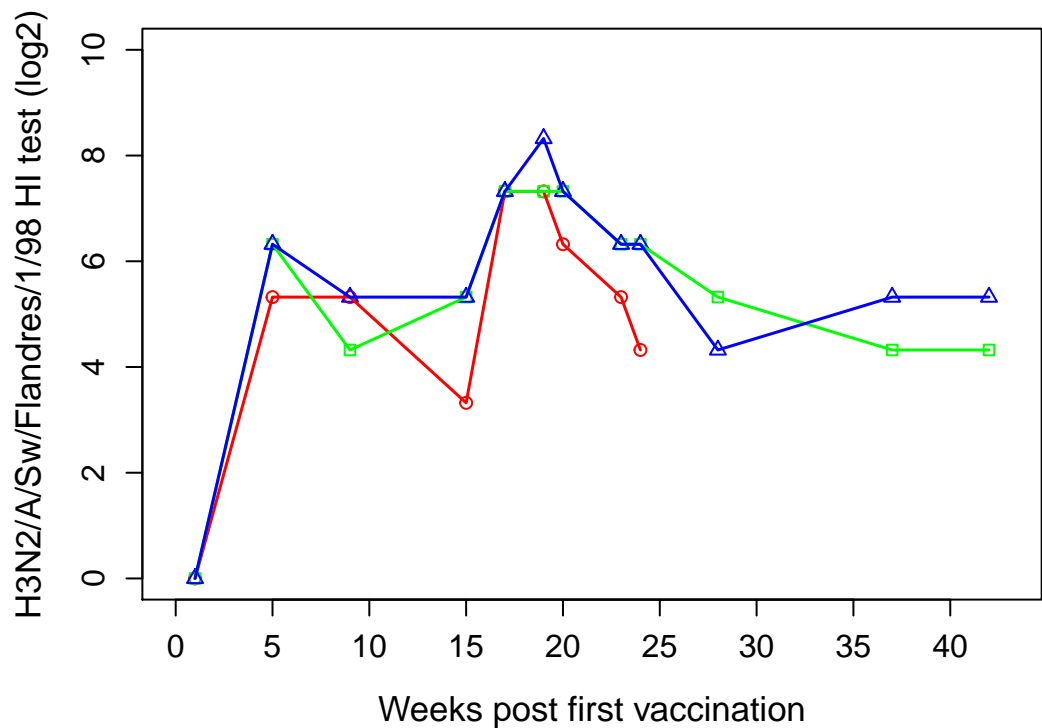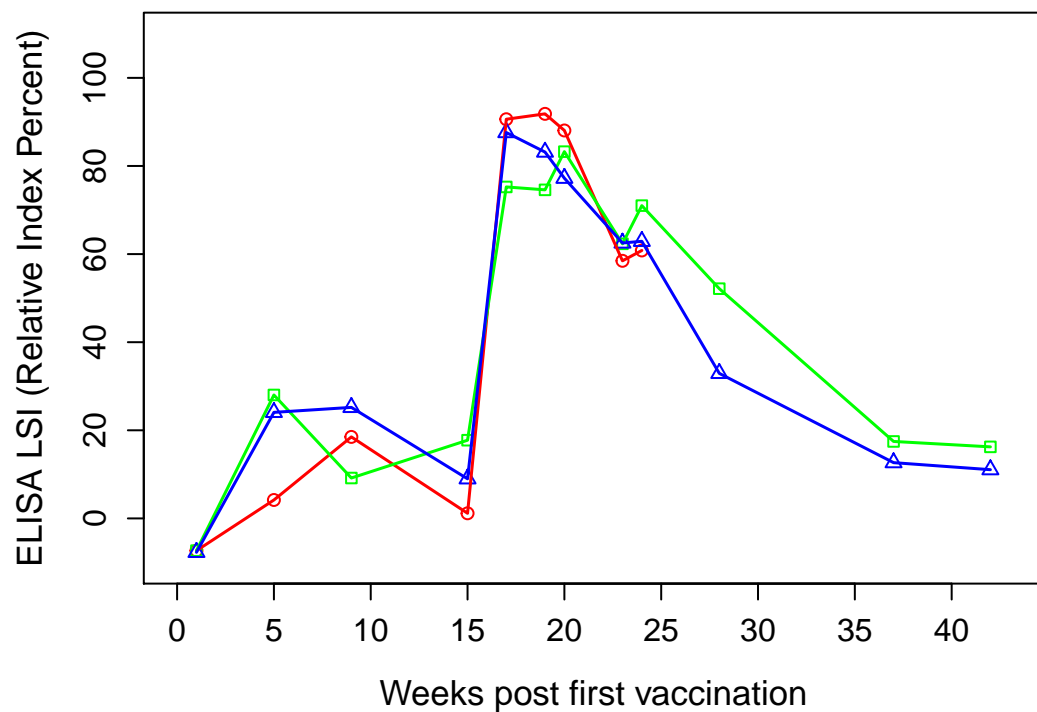

Supplement: MOESM1 [file 13567_2016_365_MOESM1_ESM.pdf]
